# Supplementary material for: Impact of hydro-meteorological conditions and flash drought duration on post-flash drought recovery time patterns
Source: Copernicus journal article supplement (doi:10.5194/hess-2024-128), 2024-05-17
Supplement: Supplementary file 1 [file hess-2024-128-supplement.pdf]

1 **Supplementary materials for**

2 **Impact of hydro-meteorological conditions and flash drought**  
3 **duration on post-flash drought recovery time patterns**

4 Mengge Lu<sup>1,2</sup>, Huaiwei Sun<sup>1,3,4,5\*</sup>, Yong Yang<sup>1</sup>, Jie Xue<sup>3</sup>, Hongbo Ling<sup>3</sup>, Hong  
5 Zhang<sup>6</sup>, Wenxin Zhang<sup>2</sup>

6 <sup>1</sup>School of Civil and Hydraulic Engineering, Huazhong University of Science and  
7 Technology, Wuhan 430074, China.

8 <sup>2</sup>Department of Physical Geography and Ecosystem Science, Lund University, Sölvegatan  
9 12, 22362 Lund, Sweden.

10 <sup>3</sup>State Key Laboratory of Desert and Oasis Ecology, Xinjiang Institute of Ecology and  
11 Geography, Chinese Academy of Sciences, Urumqi 830011, China.

12 <sup>4</sup>Hubei Key Laboratory of Digital River Basin Science and Technology, Huazhong  
13 University of Science and Technology, Wuhan 430074, China.

14 <sup>5</sup>Institute of Water Resources and Hydropower, Huazhong University of Science and  
15 Technology, Wuhan 430074, China.

16 <sup>6</sup>School of Engineering and Built Environment, Griffith University, Gold Coast Campus,  
17 4222, QLD, Australia.

18  
19 *Correspondence to:* Huaiwei Sun ([hsun@hust.edu.cn](mailto:hsun@hust.edu.cn))  
20

21  
22 This file includes:

23 Figure S1 S2 S3  
24

25 **Introduction**

26 This document provides Supplementary materials for the main *Hydrology and Earth System*  
27 *Sciences* paper. This information consists of three supplementary figures which provide further  
28 information.

29

30 **Text S1.**

31 Figure S1 shows the location of the middle and lower reaches of the Yangtze River.

32 Figure S2 shows the mean values of soil moisture (SM) and GPP anomaly between -4 pentads  
33 and +9 pentads after flash drought onset.

34 Figure. S3 shows the patten of aridity index and pentad net radiation.

35

36

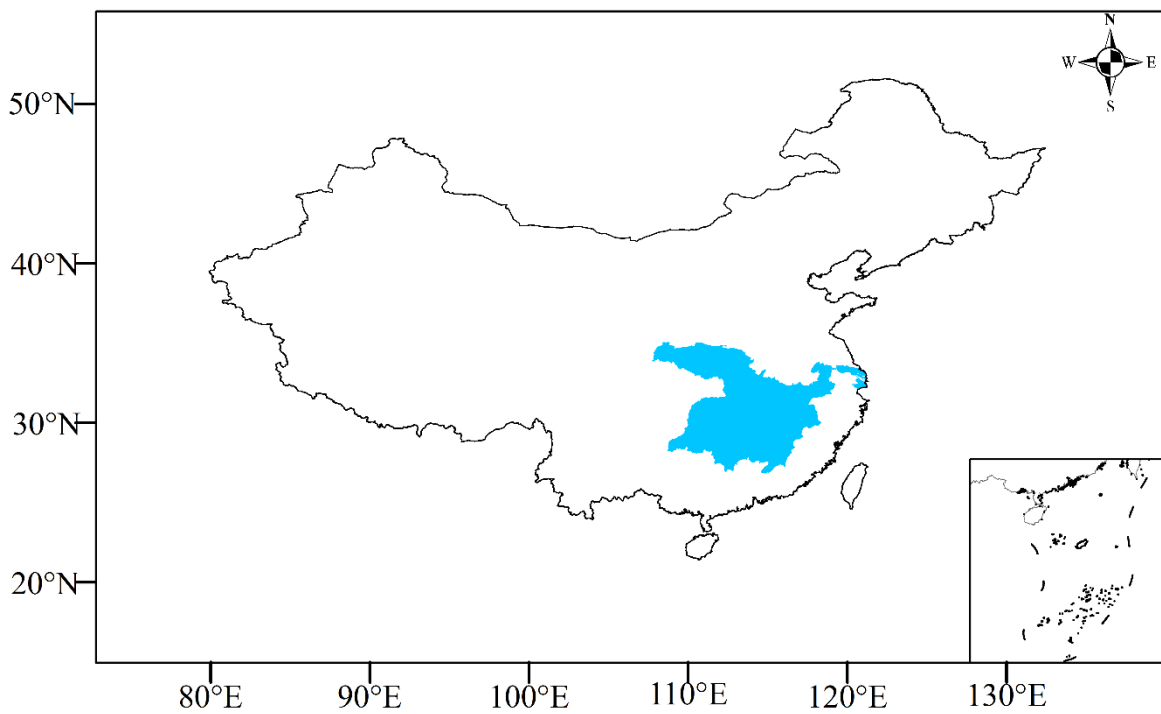

37

38 **Figure. S1.** Location of the middle and lower reaches of the Yangtze River.

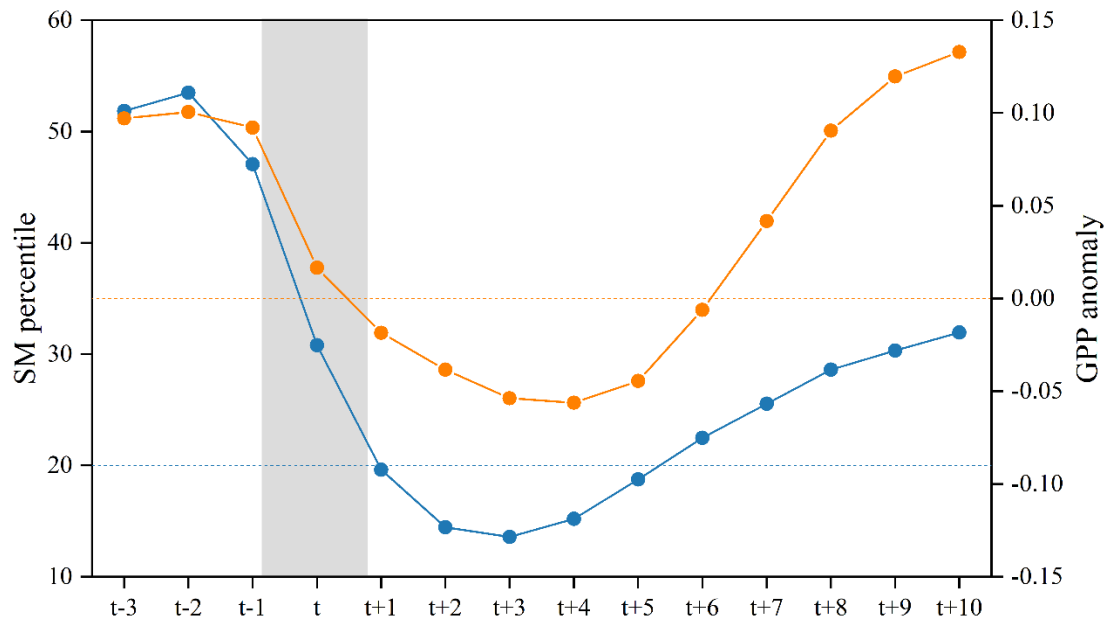

39

40 **Figure. S2.** The mean values of soil moisture (SM) and GPP anomaly between -4 pentads

41 and +9 pentads after flash drought onset.

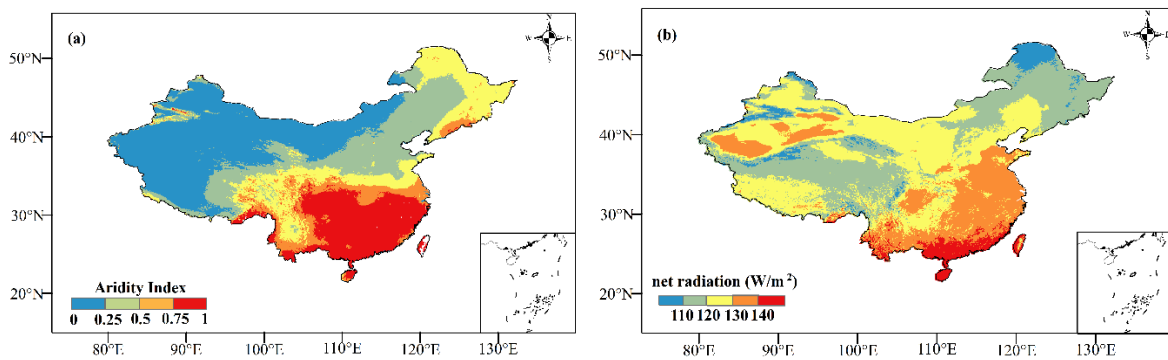

42

43 **Figure. S3.** The patten of aridity index (a) and pentad net radiation(b).
